# Supplementary material
Source: Springer Nature journal article supplement (https://www.springermedizin.de/resource/supplementary/13054_2013_3022_MOESM2_ESM.pdf/9712416)
Supplement: MOESM2 [file 9712416]

Potentially relevant citations identified  
*n* = 1731

- MEDLINE *n* = 298
- PubMed *n* = 418
- EMBASE *n* = 500
- Web of Science *n* = 500
- Cochrane Library *n* = 11
- Central *n* = 4

Articles identified after duplicates removed *n* = 1224

Titles and abstracts excluded *n* = 1093

- Irrelevant or failed inclusion criteria *n* = 995
- Related or unrelated review article *n* = 98

Articles selected to be read in full  
*n* = 131

Articles excluded *n* = 119

- Review article, comment, or letter *n* = 10
- Wrong patient population *n* = 12
- No risk factors given *n* = 65
- No reported IAH or ACS *n* = 5
- Pediatric patients *n* = 5
- Case study *n* = 2
- Non-English article *n* = 3
- Duplicate data *n* = 12
- Study did not provide patient ages *n* = 3

Articles included in the systematic review and meta-analysis  
*n* = 14

Articles reporting risk factors for IAH  
*n* = 9 (1519 patients)

Articles reporting risk factors for ACS  
*n* = 6 (974 patients)

|                                                      |                                                      |                                                          |                                                              |
|------------------------------------------------------|------------------------------------------------------|----------------------------------------------------------|--------------------------------------------------------------|
| Demographics<br><i>n</i> = 6 (629 patients)          | Presenting Diagnosis<br><i>n</i> = 7 (1273 patients) | Disease Severity<br><i>n</i> = 2 (155 patients)          | Shock/Hypotension<br><i>n</i> = 5 (927 patients)             |
| Metabolic Derangement<br><i>n</i> = 3 (222 patients) | Respiratory Status<br><i>n</i> = 2 (646 patients)    | Crystalloid Resuscitation<br><i>n</i> = 4 (345 patients) | Non-crystalloid Resuscitation<br><i>n</i> = 2 (362 patients) |

|                                                  |                                                          |                                                              |                                                      |
|--------------------------------------------------|----------------------------------------------------------|--------------------------------------------------------------|------------------------------------------------------|
| Demographics<br><i>n</i> = 5 (522 patients)      | Disease Severity<br><i>n</i> = 2 (141 patients)          | Shock/Hypotension<br><i>n</i> = 1 (188 patients)             | Metabolic Derangement<br><i>n</i> = 3 (277 patients) |
| Respiratory Status<br><i>n</i> = 2 (89 patients) | Crystalloid Resuscitation<br><i>n</i> = 3 (328 patients) | Non-crystalloid Resuscitation<br><i>n</i> = 2 (640 patients) |                                                      |
